# Supplementary material
Source: PubMed Central journal article supplement (PMC2936952)
Supplement: Supp_Data.pdf [file Supp_Data.pdf]

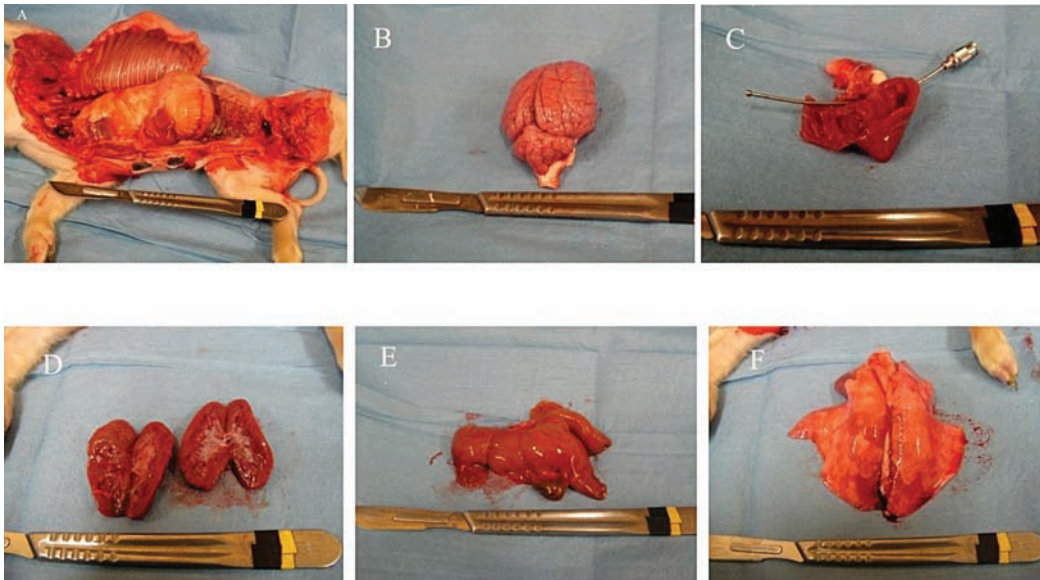

**SUPPLEMENTARY FIG. 1.** The images of pathological examination of the cloned piglet. The external and internal anatomy of the newborn piglets produced by SCNT utilizing skin-stem cell nuclei were examined by a board certified pathologist. Examination included the genitals, head, trunk, appendages, digestive system, and other organs. The piglet had two normal pinnae (auricles), two normal external nares (nostrils), two normal eyes with upper and lower eyelids and nictitating membrane (third eyelid). The trunk, thoracic (rib), lumbar (lower back), and sacral (pelvic) vertebrae were normal. The piglet's legs had the forelimbs with normal shoulders, elbows, wrists, and digits. The piglet had normal hips, knees, ankles, heels, and digits. The piglet's digestive system (mouth, oral cavity, pharynx, esophagus, stomach, small intestine, large intestine, rectum, and anus) were normal, and the spleen was a long, flat, red-brown organ that lies across the stomach; the pancreas, an elongate granular mass between the stomach and the small intestine. The cerebrum, cerebellum, medulla oblongata, spinal cord, pons, pituitary, ventricles of the brain, hypothalamus, and meninges were observed to be normal in the piglet brain. The piglet heart had four chambers and four *valves*; the *aorta* is clearly visible at the top, with an *atrium* on either side, while the *ventricles* are in the bottom left. The cortex surrounds the kidney like bark. Note the well-marked calices (white tissue). The pelvis has been sectioned and the uretra and many blood vessels have been trimmed off. The piglet's right lung consists of four lobes and the left of two lobes.

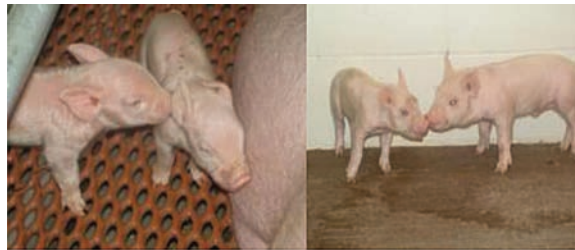

**Born: 8-14-07**

**Piglets on 8-27-07**

**Birthday Weight:**

**Body weight:**

**95-1, 1.1Kg; 95-2, 1.3Kg**

**95-1, 1.98Kg; 95-2, 3.2Kg**

**SUPPLEMENTARY FIG. 2.** Cloned piglets 95-1 and 95-2 at two different ages.

HAO ET AL.

SUPPLEMENTARY TABLE 1. MICROSATELLITE ANALYSIS OF SURROGATES, CELL LINES, AND CLONES

| Marker | Cell line-male | Cell line—male       |                      | Surrogate-1 |
|--------|----------------|----------------------|----------------------|-------------|
|        | Allele 1, 2    | Cloned piglet-male-1 | Cloned piglet-male-2 | Allele 1, 2 |
| SW2116 | 167            | 167                  | 167                  | 169, 177    |
| SW2419 | 122, 139       | 122, 139             | 122, 139             | 141         |
| SW122  | 117, 121       | 117, 121             | 117, 121             | 117, 130    |
| S0025  | 114            | 114                  | 114                  | 114, 117    |
| KS141  | 214            | 214                  | 214                  | 210         |
| SW1434 | 143, 165       | 143, 165             | 143, 165             | 163         |
| SW1135 | 185, 194       | 185, 194             | 185, 194             | 198         |
| SW874  | 210            | 210                  | 210                  | 208, 210    |
| SW864  | 173, 181       | 173, 181             | 173, 181             | 175         |
| SW38   | 131, 132       | 131, 132             | 131, 132             | 131, 135    |
| SW1918 | 193, 197       | 193, 197             | 193, 197             | 181         |
| SWC55  | 130, 156       | 130, 156             | 130, 156             | 130, 152    |
| S011   | 156            | 156                  | 156                  | 165, 166    |
| S0026  | 102, 108       | 102, 108             | 102, 108             | 106, 108    |
| S0105  | 132            | 132                  | 132                  | 130, 158    |
| SW1682 | 160            | 160                  | 160                  | 162         |
| S0120  | 172            | 172                  | 172                  | 168, 172    |

  

| Marker | Cell line-female | Cell line—female |               | Surrogate-2 |
|--------|------------------|------------------|---------------|-------------|
|        | Allele 1, 2      | Cloned piglet    | Cloned piglet | Allele 1, 2 |
| SW1824 | 99, 101          | 99, 101          | 99, 101       | 93, 98      |
| SW72   | 104, 112         | 104, 112         | 104, 112      | 114         |
| SW717  | 149, 155         | 149, 155         | 149, 155      | 149, 157    |
| S0005  | 236, 248         | 236, 248         | 236, 248      | 244         |
| SW1434 | 145              | 145              | 145           | 143         |
| SW1135 | 186, 198         | 186, 198         | 186, 198      | 196, 198    |
| SW864  | 177              | 177              | 177           | 173, 175    |
| SW1405 | 100              | 100              | 100           | 100, 107    |

The data presented represent all the markers that were informative, that is, generated an amplicon for each of the tissue samples.
